# Supplementary material
Source: publisher site journal article supplement (https://www.dovepress.com/get_supplementary_file.php?f=494237.docx)
Supplement: Supplementary file 1 [file get_supplementary_file.php]

**Appendix 1. PRISMA 2020 Checklist.**

| **Section and Topic** | **Item #** | **Checklist item** | **Location where item is reported** |
| --- | --- | --- | --- |
| **TITLE** | | |  |
| Title | 1 | Identify the report as a systematic review. | 1 |
| **ABSTRACT** | | |  |
| Abstract | 2 | See the PRISMA 2020 for Abstracts checklist. | 2 |
| **INTRODUCTION** | | |  |
| Rationale | 3 | Describe the rationale for the review in the context of existing knowledge. | 4-5 |
| Objectives | 4 | Provide an explicit statement of the objective(s) or question(s) the review addresses. | 5 |
| **METHODS** | | |  |
| Eligibility criteria | 5 | Specify the inclusion and exclusion criteria for the review and how studies were grouped for the syntheses. | 5 |
| Information sources | 6 | Specify all databases, registers, websites, organisations, reference lists and other sources searched or consulted to identify studies. Specify the date when each source was last searched or consulted. | 7 and figure 1 |
| Search strategy | 7 | Present the full search strategies for all databases, registers and websites, including any filters and limits used. | Supplement S2 |
| Selection process | 8 | Specify the methods used to decide whether a study met the inclusion criteria of the review, including how many reviewers screened each record and each report retrieved, whether they worked independently, and if applicable, details of automation tools used in the process. | 5-6 |
| Data collection process | 9 | Specify the methods used to collect data from reports, including how many reviewers collected data from each report, whether they worked independently, any processes for obtaining or confirming data from study investigators, and if applicable, details of automation tools used in the process. | 5-6 |
| Data items | 10a | List and define all outcomes for which data were sought. Specify whether all results that were compatible with each outcome domain in each study were sought (e.g. for all measures, time points, analyses), and if not, the methods used to decide which results to collect. | 5-6 |
| 10b | List and define all other variables for which data were sought (e.g. participant and intervention characteristics, funding sources). Describe any assumptions made about any missing or unclear information. | 5-6 |
| Study risk of bias assessment | 11 | Specify the methods used to assess risk of bias in the included studies, including details of the tool(s) used, how many reviewers assessed each study and whether they worked independently, and if applicable, details of automation tools used in the process. | 6 |
| Effect measures | 12 | Specify for each outcome the effect measure(s) (e.g. risk ratio, mean difference) used in the synthesis or presentation of results. | 7-8 |
| Synthesis methods | 13a | Describe the processes used to decide which studies were eligible for each synthesis (e.g. tabulating the study intervention characteristics and comparing against the planned groups for each synthesis (item #5)). | None |
| 13b | Describe any methods required to prepare the data for presentation or synthesis, such as handling of missing summary statistics, or data conversions. | No missing data or data conversion |
| 13c | Describe any methods used to tabulate or visually display results of individual studies and syntheses. | 6 |
| 13d | Describe any methods used to synthesize results and provide a rationale for the choice(s). If meta-analysis was performed, describe the model(s), method(s) to identify the presence and extent of statistical heterogeneity, and software package(s) used. | 6 |
| 13e | Describe any methods used to explore possible causes of heterogeneity among study results (e.g. subgroup analysis, meta-regression). | 6 |
| 13f | Describe any sensitivity analyses conducted to assess robustness of the synthesized results. | 6 |
| Reporting bias assessment | 14 | Describe any methods used to assess risk of bias due to missing results in a synthesis (arising from reporting biases). | 6 |
| Certainty assessment | 15 | Describe any methods used to assess certainty (or confidence) in the body of evidence for an outcome. | 6 |
| **RESULTS** | | |  |
| Study selection | 16a | Describe the results of the search and selection process, from the number of records identified in the search to the number of studies included in the review, ideally using a flow diagram. | Fig 1. |
| 16b | Cite studies that might appear to meet the inclusion criteria, but which were excluded, and explain why they were excluded. | Fig 1. |
| Study characteristics | 17 | Cite each included study and present its characteristics. | 7 and Table 1 |
| Risk of bias in studies | 18 | Present assessments of risk of bias for each included study. | Fig 2 and  Table 2 |
| Results of individual studies | 19 | For all outcomes, present, for each study: (a) summary statistics for each group (where appropriate) and (b) an effect estimate and its precision (e.g. confidence/credible interval), ideally using structured tables or plots. | Figure 3 |
| Results of syntheses | 20a | For each synthesis, briefly summarise the characteristics and risk of bias among contributing studies. | Table 1-2  Fig 2 |
| 20b | Present results of all statistical syntheses conducted. If meta-analysis was done, present for each the summary estimate and its precision (e.g. confidence/credible interval) and measures of statistical heterogeneity. If comparing groups, describe the direction of the effect. | Fig 3 |
| 20c | Present results of all investigations of possible causes of heterogeneity among study results. | 8 |
| 20d | Present results of all sensitivity analyses conducted to assess the robustness of the synthesized results. | 7-8 |
| Reporting biases | 21 | Present assessments of risk of bias due to missing results (arising from reporting biases) for each synthesis assessed. | 6-7 |
| Certainty of evidence | 22 | Present assessments of certainty (or confidence) in the body of evidence for each outcome assessed. | 7-9 |
| **DISCUSSION** | | |  |
| Discussion | 23a | Provide a general interpretation of the results in the context of other evidence. | 09-10 |
| 23b | Discuss any limitations of the evidence included in the review. | 11 |
| 23c | Discuss any limitations of the review processes used. | 11 |
| 23d | Discuss implications of the results for practice, policy, and future research. | 12-13 |
| **OTHER INFORMATION** | | |  |
| Registration and protocol | 24a | Provide registration information for the review, including register name and registration number, or state that the review was not registered. | 5 |
| 24b | Indicate where the review protocol can be accessed, or state that a protocol was not prepared. | 5 |
| 24c | Describe and explain any amendments to information provided at registration or in the protocol. | No amendment |
| Support | 25 | Describe sources of financial or non-financial support for the review, and the role of the funders or sponsors in the review. | 13 |
| Competing interests | 26 | Declare any competing interests of review authors. | 13 |
| Availability of data, code and other materials | 27 | Report which of the following are publicly available and where they can be found: template data collection forms; data extracted from included studies; data used for all analyses; analytic code; any other materials used in the review. | none |

*From:*  Page MJ, McKenzie JE, Bossuyt PM, Boutron I, Hoffmann TC, Mulrow CD, et al. The PRISMA 2020 statement: an updated guideline for reporting systematic reviews. BMJ 2021;372:n71.18

**Appendix 2. search details.**

**Search database:** PubMed

**Search Query**: (((Saline Solution[MeSH Terms]) OR (Normal Saline or Saline, Normal or 0.9% Saline or Saline, 0.9% or 0.9% NaCl or Saline)) AND ((intrathecal or subarachnoid or Peridural or Epidural or Caudal or Spinal Injections or Injection, Spinal or Spinal Injection or Injections, Intraspinal or Injection, Intraspinal or Intraspinal Injection or Intraspinal Injections or Injections, Intrathecal or Injection, Intrathecal or Intrathecal Injection or Intrathecal Injections or Spaces, Subarachnoid or Space, Subarachnoid or Subarachnoid Spaces or Injections, Extradural or Extradural Injection or Injection, Extradural or Extradural Injections or Epidural Injections or Epidural Injection or Injection, Epidural or Injections, Peridural or Injection, Peridural or Peridural Injection or Peridural Injections or Epidural Spaces or Space, Epidural or Spaces, Epidural) OR (Injections, Spinal or Subarachnoid Space or Injections, Epidural or Epidural Space[MeSH Terms]))) AND (((Headache, Post-Dural Puncture or Headaches, Post-Dural Puncture or Headache, Postdural Puncture or Headaches, Postdural Puncture or Headache or Postdural Puncture Headaches or Post-Lumbar Puncture Headache or Post Dural Puncture Headache or Post-Dural Puncture Headaches or Postdural Puncture Headache or postspinal headache) OR ("Post-Dural Puncture Headache"[Mesh])) OR (inadvertent dural puncture or accidental dural puncture or unintentional dural puncture)) ("saline solution"[MeSH Terms] OR ("saline solution"[MeSH Terms] OR ("saline"[All Fields] AND "solution"[All Fields]) OR "saline solution"[All Fields] OR ("normal"[All Fields] AND "saline"[All Fields]) OR "normal saline"[All Fields] OR ("saline solution"[MeSH Terms] OR ("saline"[All Fields] AND "solution"[All Fields]) OR "saline solution"[All Fields] OR ("saline"[All Fields] AND "normal"[All Fields]) OR "saline normal"[All Fields]) OR ("saline solution"[MeSH Terms] OR ("saline"[All Fields] AND "solution"[All Fields]) OR "saline solution"[All Fields] OR "0 9 saline"[All Fields]) OR ("saline solution"[MeSH Terms] OR ("saline"[All Fields] AND "solution"[All Fields]) OR "saline solution"[All Fields] OR "saline 0 9"[All Fields]) OR ("saline solution"[MeSH Terms] OR ("saline"[All Fields] AND "solution"[All Fields]) OR "saline solution"[All Fields] OR "0 9 nacl"[All Fields]) OR ("saline solution"[MeSH Terms] OR ("saline"[All Fields] AND "solution"[All Fields]) OR "saline solution"[All Fields] OR "saline"[All Fields] OR "salines"[All Fields]))) AND ("intrathecal"[All Fields] OR "intrathecally"[All Fields] OR ("subarachnoid space"[MeSH Terms] OR ("subarachnoid"[All Fields] AND "space"[All Fields]) OR "subarachnoid space"[All Fields] OR "subarachnoid"[All Fields] OR "subarachnoidal"[All Fields] OR "subarachnoidally"[All Fields] OR "subarachnoideal"[All Fields]) OR ("peridural"[All Fields] OR "peridurally"[All Fields]) OR ("epidural"[All Fields] OR "epidurally"[All Fields] OR "epidurals"[All Fields] OR "epiduritis"[All Fields]) OR ("caudal"[All Fields] OR "caudale"[All Fields] OR "caudalization"[All Fields] OR "caudalized"[All Fields] OR "caudalizing"[All Fields] OR "caudally"[All Fields] OR "caudals"[All Fields]) OR ("injections, spinal"[MeSH Terms] OR ("injections"[All Fields] AND "spinal"[All Fields]) OR "spinal injections"[All Fields] OR ("spinal"[All Fields] AND "injections"[All Fields])) OR ("injections, spinal"[MeSH Terms] OR ("injections"[All Fields] AND "spinal"[All Fields]) OR "spinal injections"[All Fields] OR ("injection"[All Fields] AND "spinal"[All Fields]) OR "injection spinal"[All Fields]) OR ("injections, spinal"[MeSH Terms] OR ("injections"[All Fields] AND "spinal"[All Fields]) OR "spinal injections"[All Fields] OR ("spinal"[All Fields] AND "injection"[All Fields]) OR "spinal injection"[All Fields]) OR ("injections, spinal"[MeSH Terms] OR ("injections"[All Fields] AND "spinal"[All Fields]) OR "spinal injections"[All Fields] OR ("injections"[All Fields] AND "intraspinal"[All Fields]) OR "injections intraspinal"[All Fields]) OR ("injections, spinal"[MeSH Terms] OR ("injections"[All Fields] AND "spinal"[All Fields]) OR "spinal injections"[All Fields] OR ("injection"[All Fields] AND "intraspinal"[All Fields])) OR ("injections, spinal"[MeSH Terms] OR ("injections"[All Fields] AND "spinal"[All Fields]) OR "spinal injections"[All Fields] OR ("intraspinal"[All Fields] AND "injection"[All Fields]) OR "intraspinal injection"[All Fields]) OR ("injections, spinal"[MeSH Terms] OR ("injections"[All Fields] AND "spinal"[All Fields]) OR "spinal injections"[All Fields] OR ("intraspinal"[All Fields] AND "injections"[All Fields]) OR "intraspinal injections"[All Fields]) OR ("injections, spinal"[MeSH Terms] OR ("injections"[All Fields] AND "spinal"[All Fields]) OR "spinal injections"[All Fields] OR ("injections"[All Fields] AND "intrathecal"[All Fields]) OR "injections intrathecal"[All Fields]) OR ("injections, spinal"[MeSH Terms] OR ("injections"[All Fields] AND "spinal"[All Fields]) OR "spinal injections"[All Fields] OR ("injection"[All Fields] AND "intrathecal"[All Fields]) OR "injection intrathecal"[All Fields]) OR ("injections, spinal"[MeSH Terms] OR ("injections"[All Fields] AND "spinal"[All Fields]) OR "spinal injections"[All Fields] OR ("intrathecal"[All Fields] AND "injection"[All Fields]) OR "intrathecal injection"[All Fields]) OR ("injections, spinal"[MeSH Terms] OR ("injections"[All Fields] AND "spinal"[All Fields]) OR "spinal injections"[All Fields] OR ("intrathecal"[All Fields] AND "injections"[All Fields]) OR "intrathecal injections"[All Fields]) OR ("subarachnoid space"[MeSH Terms] OR ("subarachnoid"[All Fields] AND "space"[All Fields]) OR "subarachnoid space"[All Fields] OR ("spaces"[All Fields] AND "subarachnoid"[All Fields]) OR "spaces subarachnoid"[All Fields]) OR ("subarachnoid space"[MeSH Terms] OR ("subarachnoid"[All Fields] AND "space"[All Fields]) OR "subarachnoid space"[All Fields] OR ("space"[All Fields] AND "subarachnoid"[All Fields]) OR "space subarachnoid"[All Fields]) OR ("subarachnoid space"[MeSH Terms] OR ("subarachnoid"[All Fields] AND "space"[All Fields]) OR "subarachnoid space"[All Fields] OR ("subarachnoid"[All Fields] AND "spaces"[All Fields]) OR "subarachnoid spaces"[All Fields]) OR ("injections, epidural"[MeSH Terms] OR ("injections"[All Fields] AND "epidural"[All Fields]) OR "epidural injections"[All Fields] OR ("injections"[All Fields] AND "extradural"[All Fields]) OR "injections extradural"[All Fields]) OR ("injections, epidural"[MeSH Terms] OR ("injections"[All Fields] AND "epidural"[All Fields]) OR "epidural injections"[All Fields] OR ("extradural"[All Fields] AND "injection"[All Fields]) OR "extradural injection"[All Fields]) OR ("injections, epidural"[MeSH Terms] OR ("injections"[All Fields] AND "epidural"[All Fields]) OR "epidural injections"[All Fields] OR ("injection"[All Fields] AND "extradural"[All Fields]) OR "injection extradural"[All Fields]) OR ("injections, epidural"[MeSH Terms] OR ("injections"[All Fields] AND "epidural"[All Fields]) OR "epidural injections"[All Fields] OR ("extradural"[All Fields] AND "injections"[All Fields]) OR "extradural injections"[All Fields]) OR ("injections, epidural"[MeSH Terms] OR ("injections"[All Fields] AND "epidural"[All Fields]) OR "epidural injections"[All Fields] OR ("epidural"[All Fields] AND "injections"[All Fields])) OR ("injections, epidural"[MeSH Terms] OR ("injections"[All Fields] AND "epidural"[All Fields]) OR "epidural injections"[All Fields] OR ("epidural"[All Fields] AND "injection"[All Fields]) OR "epidural injection"[All Fields]) OR ("injections, epidural"[MeSH Terms] OR ("injections"[All Fields] AND "epidural"[All Fields]) OR "epidural injections"[All Fields] OR ("injection"[All Fields] AND "epidural"[All Fields]) OR "injection epidural"[All Fields]) OR ("injections, epidural"[MeSH Terms] OR ("injections"[All Fields] AND "epidural"[All Fields]) OR "epidural injections"[All Fields] OR ("injections"[All Fields] AND "peridural"[All Fields])) OR ("injections, epidural"[MeSH Terms] OR ("injections"[All Fields] AND "epidural"[All Fields]) OR "epidural injections"[All Fields] OR ("injection"[All Fields] AND "peridural"[All Fields])) OR ("injections, epidural"[MeSH Terms] OR ("injections"[All Fields] AND "epidural"[All Fields]) OR "epidural injections"[All Fields] OR ("peridural"[All Fields] AND "injection"[All Fields]) OR "peridural injection"[All Fields]) OR ("injections, epidural"[MeSH Terms] OR ("injections"[All Fields] AND "epidural"[All Fields]) OR "epidural injections"[All Fields] OR ("peridural"[All Fields] AND "injections"[All Fields]) OR "peridural injections"[All Fields]) OR ("epidural space"[MeSH Terms] OR ("epidural"[All Fields] AND "space"[All Fields]) OR "epidural space"[All Fields] OR ("epidural"[All Fields] AND "spaces"[All Fields]) OR "epidural spaces"[All Fields]) OR ("epidural space"[MeSH Terms] OR ("epidural"[All Fields] AND "space"[All Fields]) OR "epidural space"[All Fields] OR ("space"[All Fields] AND "epidural"[All Fields]) OR "space epidural"[All Fields]) OR ("epidural space"[MeSH Terms] OR ("epidural"[All Fields] AND "space"[All Fields]) OR "epidural space"[All Fields] OR ("spaces"[All Fields] AND "epidural"[All Fields]) OR "spaces epidural"[All Fields]) OR ("injections, spinal"[MeSH Terms] OR ("injections"[All Fields] AND "spinal"[All Fields]) OR "spinal injections"[All Fields] OR "injections spinal"[All Fields] OR ("subarachnoid space"[MeSH Terms] OR ("subarachnoid"[All Fields] AND "space"[All Fields]) OR "subarachnoid space"[All Fields]) OR ("injections, epidural"[MeSH Terms] OR ("injections"[All Fields] AND "epidural"[All Fields]) OR "epidural injections"[All Fields] OR "injections epidural"[All Fields]) OR "epidural space"[MeSH Terms])) AND ("Post-Dural Puncture Headache"[MeSH Terms] OR ("post dural"[All Fields] AND "puncture"[All Fields] AND "headache"[All Fields]) OR "Post-Dural Puncture Headache"[All Fields] OR ("headache"[All Fields] AND "post"[All Fields] AND "dural"[All Fields] AND "puncture"[All Fields]) OR "headache post dural puncture"[All Fields] OR ("Post-Dural Puncture Headache"[MeSH Terms] OR ("post dural"[All Fields] AND "puncture"[All Fields] AND "headache"[All Fields]) OR "Post-Dural Puncture Headache"[All Fields] OR ("headaches"[All Fields] AND "post"[All Fields] AND "dural"[All Fields] AND "puncture"[All Fields])) OR ("Post-Dural Puncture Headache"[MeSH Terms] OR ("post dural"[All Fields] AND "puncture"[All Fields] AND "headache"[All Fields]) OR "Post-Dural Puncture Headache"[All Fields] OR ("headache"[All Fields] AND "postdural"[All Fields] AND "puncture"[All Fields]) OR "headache postdural puncture"[All Fields]) OR ("Post-Dural Puncture Headache"[MeSH Terms] OR ("post dural"[All Fields] AND "puncture"[All Fields] AND "headache"[All Fields]) OR "Post-Dural Puncture Headache"[All Fields] OR ("headaches"[All Fields] AND "postdural"[All Fields] AND "puncture"[All Fields])) OR ("headache"[MeSH Terms] OR "headache"[All Fields] OR "headaches"[All Fields] OR "headache s"[All Fields]) OR ("Post-Dural Puncture Headache"[MeSH Terms] OR ("post dural"[All Fields] AND "puncture"[All Fields] AND "headache"[All Fields]) OR "Post-Dural Puncture Headache"[All Fields] OR ("postdural"[All Fields] AND "puncture"[All Fields] AND "headaches"[All Fields]) OR "postdural puncture headaches"[All Fields]) OR ("Post-Dural Puncture Headache"[MeSH Terms] OR ("post dural"[All Fields] AND "puncture"[All Fields] AND "headache"[All Fields]) OR "Post-Dural Puncture Headache"[All Fields] OR ("post"[All Fields] AND "lumbar"[All Fields] AND "puncture"[All Fields] AND "headache"[All Fields]) OR "post lumbar puncture headache"[All Fields]) OR ("Post-Dural Puncture Headache"[MeSH Terms] OR ("post dural"[All Fields] AND "puncture"[All Fields] AND "headache"[All Fields]) OR "Post-Dural Puncture Headache"[All Fields] OR ("post"[All Fields] AND "dural"[All Fields] AND "puncture"[All Fields] AND "headache"[All Fields]) OR "Post-Dural Puncture Headache"[All Fields]) OR ("Post-Dural Puncture Headache"[MeSH Terms] OR ("post dural"[All Fields] AND "puncture"[All Fields] AND "headache"[All Fields]) OR "Post-Dural Puncture Headache"[All Fields] OR ("post"[All Fields] AND "dural"[All Fields] AND "puncture"[All Fields] AND "headaches"[All Fields]) OR "post dural puncture headaches"[All Fields]) OR ("Post-Dural Puncture Headache"[MeSH Terms] OR ("post dural"[All Fields] AND "puncture"[All Fields] AND "headache"[All Fields]) OR "Post-Dural Puncture Headache"[All Fields] OR ("postdural"[All Fields] AND "puncture"[All Fields] AND "headache"[All Fields]) OR "postdural puncture headache"[All Fields]) OR ("Post-Dural Puncture Headache"[MeSH Terms] OR ("post dural"[All Fields] AND "puncture"[All Fields] AND "headache"[All Fields]) OR "Post-Dural Puncture Headache"[All Fields] OR ("postspinal"[All Fields] AND "headache"[All Fields]) OR "postspinal headache"[All Fields]) OR "Post-Dural Puncture Headache"[MeSH Terms] OR ((("inadvertant"[All Fields] OR "inadvertent"[All Fields] OR "inadvertently"[All Fields]) AND "dural"[All Fields] AND ("punctured"[All Fields] OR "punctures"[MeSH Terms] OR "punctures"[All Fields] OR "puncture"[All Fields] OR "puncturing"[All Fields])) OR (("accidentally"[All Fields] OR "accidentals"[All Fields] OR "accidents"[MeSH Terms] OR "accidents"[All Fields] OR "accidental"[All Fields]) AND "dural"[All Fields] AND ("punctured"[All Fields] OR "punctures"[MeSH Terms] OR "punctures"[All Fields] OR "puncture"[All Fields] OR "puncturing"[All Fields])) OR ("unintentional"[All Fields] AND "dural"[All Fields] AND ("punctured"[All Fields] OR "punctures"[MeSH Terms] OR "punctures"[All Fields] OR "puncture"[All Fields] OR "puncturing"[All Fields]))))

**Search Results**: 231

**Search Time**: 2024/6/27 9:20

**Search database**:Cochrane Library

**Search** Date: 27/06/2024 07:44:36

ID Search Hits

#1 (inadvertent dural puncture):ti,ab,kw OR (accidental dural puncture):ti,ab,kw OR (unintentional dural puncture):ti,ab,kw OR (Headache, Post-Dural Puncture):ti,ab,kw OR (Headaches, Post-Dural Puncture):ti,ab,kw OR (Headache, Postdural Puncture):ti,ab,kw OR (Headaches, Postdural Puncture):ti,ab,kw OR (Headache):ti,ab,kw OR (Postdural Puncture Headaches):ti,ab,kw OR (Post-Lumbar Puncture Headache):ti,ab,kw OR (Post Dural Puncture Headache):ti,ab,kw OR (Post-Dural Puncture Headaches):ti,ab,kw OR (Postdural Puncture Headache):ti,ab,kw OR (postspinal headache):ti,ab,kw 37901

#2 MeSH descriptor: [Post-Dural Puncture Headache] explode all trees 151

#3 #1 or #2 37901

#4 (intrathecal):ti,ab,kw or (subarachnoid):ti,ab,kw or (Peridural):ti,ab,kw or (Epidural):ti,ab,kw or (Caudal):ti,ab,kw or (Spinal Injections):ti,ab,kw or (Injection, Spinal):ti,ab,kw or (Spinal Injection):ti,ab,kw or (Injections, Intraspinal):ti,ab,kw or (Injection, Intraspinal):ti,ab,kw or (Intraspinal Injection):ti,ab,kw or (Intraspinal Injections):ti,ab,kw or (Injections, Intrathecal):ti,ab,kw or (Injection, Intrathecal):ti,ab,kw or (Intrathecal Injection):ti,ab,kw or (Intrathecal Injections):ti,ab,kw or (Spaces, Subarachnoid):ti,ab,kw or (Space, Subarachnoid):ti,ab,kw or (Subarachnoid Spaces):ti,ab,kw or (Injections, Extradural):ti,ab,kw or (Extradural Injection):ti,ab,kw or (Injection, Extradural):ti,ab,kw or (Extradural Injections):ti,ab,kw or (Epidural Injections):ti,ab,kw or (Epidural Injection):ti,ab,kw or (Injection, Epidural):ti,ab,kw or (Injections, Peridural):ti,ab,kw or (Injection, Peridural):ti,ab,kw or (Peridural Injection):ti,ab,kw or (Peridural Injections):ti,ab,kw or (Epidural Spaces):ti,ab,kw or (Space, Epidural):ti,ab,kw or (Spaces, Epidural):ti,ab,kw 28293

#5 MeSH descriptor: [Injections, Spinal] explode all trees 1826

#6 MeSH descriptor: [Injections, Epidural] explode all trees 640

#7 MeSH descriptor: [Epidural Space] explode all trees 295

#8 MeSH descriptor: [Subarachnoid Space] explode all trees 191

#9 #4 or #5 or #6 or #7 or #8 28294

#10 (Normal Saline):ti,ab,kw or (Saline, Normal):ti,ab,kw or (0.9% Saline):ti,ab,kw or (Saline, 0.9%):ti,ab,kw or (0.9% NaCl):ti,ab,kw or (Saline):ti,ab,kw 47157

#11 MeSH descriptor: [Saline Solution] explode all trees 449

#12 #10 or #11 47157

#13 #3 and #9 and #12 201

**Search database**:Web of Science

# Search Results Date Run:

**1** ((((((((((((((TS=(inadvertent dural puncture)) OR TS=(accidental dural puncture)) OR TS=(unintentional dural puncture)) OR TS=(Headache, Post-Dural Puncture)) OR TS=(Headaches, Post-Dural Puncture)) OR TS=(Headache, Postdural Puncture)) OR TS=(Headaches, Postdural Puncture)) OR TS=(Headache)) OR TS=(Postdural Puncture Headaches)) OR TS=(Post-Lumbar Puncture Headache)) OR TS=(Post Dural Puncture Headache)) OR TS=(Post-Dural Puncture Headaches)) OR TS=(Postdural Puncture Headache)) OR TS=(postspinal headache)) OR TS=(Post-Dural Puncture Headache) 108454 Thu Jun 27 2024 21:49:02 GMT+0800 (GMT+08:00)

**2** "(((((((((((((((((((((((((((((((((((((TS=(intrathecal)) OR TS=(subarachnoid)) OR TS=(Peridural)) OR TS=(Epidural)) OR TS=(Caudal)) OR TS=(Spinal Injections)) OR TS=(Injection, Spinal)) OR TS=(Spinal Injection)) OR TS=(Injections, Intraspinal)) OR TS=(Injection, Intraspinal)) OR TS=(Intraspinal Injection)) OR TS=(Intraspinal Injections)) OR TS=(Injections, Intrathecal)) OR TS=(Injection, Intrathecal)) OR TS=(Injection, Intrathecal)) OR TS=(Intrathecal Injection)) OR TS=(Intrathecal Injections)) OR TS=(Spaces, Subarachnoid)) OR TS=(Space, Subarachnoid)) OR TS=(Subarachnoid Spaces)) OR TS=(Injections, Extradural)) OR TS=(Extradural Injection)) OR TS=(Injection, Extradural)) OR TS=(Extradural Injections)) OR TS=(Epidural Injections)) OR TS=(Epidural Injection)) OR TS=(Injection, Epidural)) OR TS=(Injections, Peridural)) OR TS=(Injection, Peridural)) OR TS=(Peridural Injection)) OR TS=(Peridural Injections)) OR TS=(Epidural Spaces)) OR TS=(Space, Epidural)) OR TS=(Spaces, Epidural)) OR TS=(Injections, Spinal)) OR TS=(Subarachnoid Space)) OR TS=(Injections, Epidural)) OR TS=(Epidural Space)" 195246 Thu Jun 27 2024 21:49:23 GMT+0800 (GMT+08:00)

**3** "((((((TS=(Saline Solution)) OR TS=(Normal Saline)) OR TS=(Saline, Normal)) OR TS=(0.9% Saline)) OR TS=(Saline, 0.9%)) OR TS=(0.9% NaCl)) OR TS=(Saline) " 261431 Thu Jun 27 2024 21:49:35 GMT+0800 (GMT+08:00)

4 "#1 AND #2 AND #3 " 208 Thu Jun 27 2024 21:50:05 GMT+0800 (GMT+08:00)

**Search database**: Embase

No. Query Results Results Date

#4. #1 AND #2 AND #3 513 27-Jun-24

#3. saline AND solution OR (normal AND saline) OR (saline, AND normal) OR (0.9% AND saline) OR (saline, AND 0.9%) OR (0.9% AND nacl) OR saline 308,405 27-Jun-24

#2. intrathecal OR subarachnoid OR peridural OR epidural OR caudal OR (spinal AND injections) OR (injection, AND spinal) OR (spinal AND injection) OR (injections, AND intraspinal) OR (injection, AND intraspinal) OR (intraspinal AND injection) OR (intraspinal AND injections) OR (injections, AND intrathecal) OR (injection, AND intrathecal) OR (intrathecal AND injection) OR (intrathecal AND injections) OR (spaces, AND subarachnoid) OR (space, AND subarachnoid) OR (subarachnoid AND spaces) OR (injections, AND extradural) OR (extradural AND injection) OR (injection, AND extradural) OR (extradural AND injections) OR (epidural AND injections) OR (epidural AND injection) OR (injection, AND epidural) OR (injections, AND peridural) OR (injection, AND peridural) OR (peridural AND injection) OR (peridural AND injections) OR (epidural AND spaces) OR (space, AND epidural) OR (spaces, AND epidural) OR (injections, AND spinal) OR (subarachnoid AND space) OR (injections, AND epidural) OR (epidural AND space) 313,899 27-Jun-24

#1. inadvertent AND dural AND puncture OR (accidental AND dural AND puncture) OR (unintentional AND dural AND puncture) OR (headache, AND 'post dural' AND puncture) OR (headaches, AND 'post dural' AND puncture) OR (headache, AND postdural AND puncture) OR (headaches, AND postdural AND puncture) OR headache OR (postdural AND puncture AND headaches) OR ('post lumbar' AND puncture AND headache) OR (post AND dural AND puncture AND headache) OR ('post dural' AND puncture AND headaches) OR (postdural AND puncture AND headache) OR (postspinal AND headache) OR ('post dural' AND puncture AND headache) 379,357 27 Jun 2024
